# Supplementary material for: Double emulsions for the compatibilization of hydrophilic nanocellulose with non-polar polymers and validation in the synthesis of composite fibers
Source: Royal Society of Chemistry journal article supplement (doi:10.1039/c5sm02578h), 2016-01-01
Supplement: c5sm02578h1.pdf [file c5sm02578h1.pdf]

## Supplementary Information

### Double emulsions for the compatibilization of hydrophilic nanocellulose with non-polar polymers and validation in the synthesis of composite fibers

*Carlos A. Carrillo<sup>1,\*</sup>, Tiina Nypelö<sup>1,&</sup>, Orlando J. Rojas<sup>1,2,3,\*</sup>*

<sup>1</sup> Department of Forest Biomaterials, North Carolina State University, Campus Box 8005, Raleigh, NC 27695, USA

<sup>2</sup> Bio-based Colloids and Materials (BiCMat) and Centre of Excellence in Molecular Engineering of Bio-synthetic Hybrid Materials, School of Chemical Technology, Aalto University, P.O. Box 16300, Espoo, Finland.

<sup>3</sup> Department of Chemical and Biomolecular Engineering, North Carolina State University, Campus Box 7905, Raleigh, NC 27695, USA.

<sup>&</sup>Current address (T.N.): University of Natural Resources and Life Sciences, Vienna. Konrad Lorenz Strasse 24, 3430 Tulln, Austria.

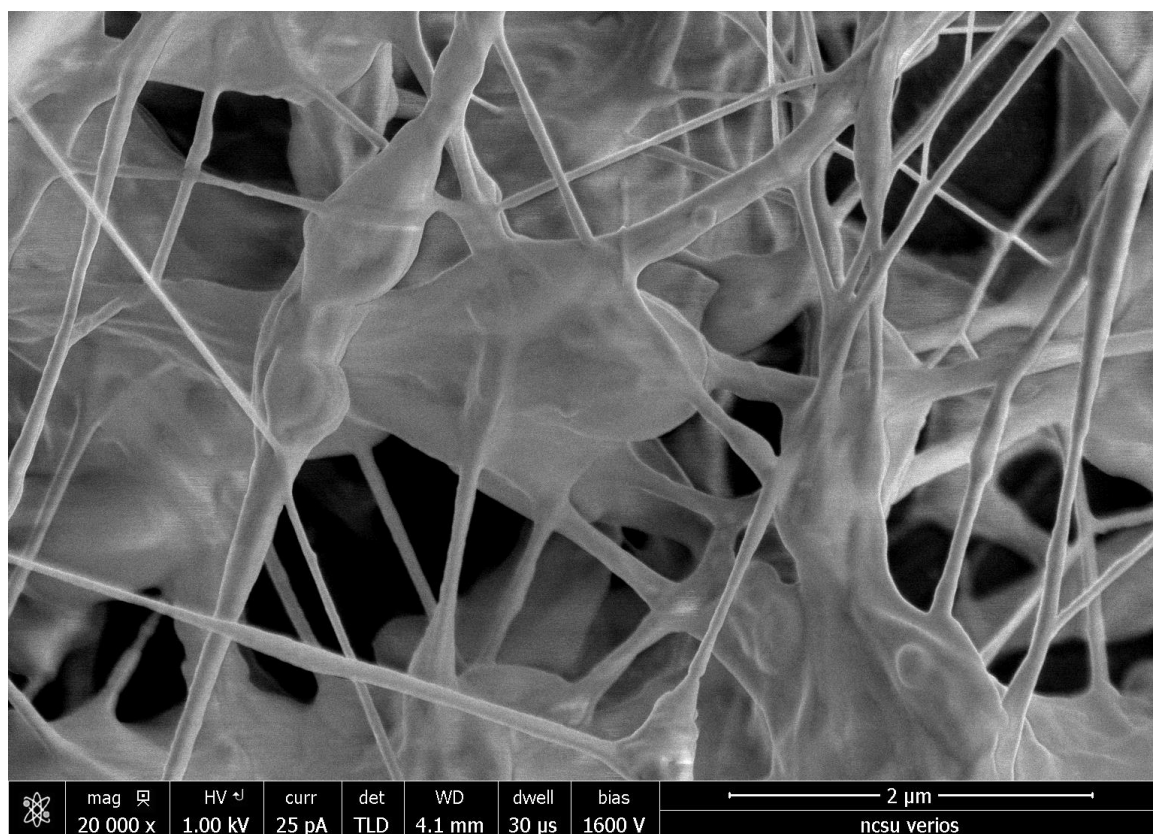

**Figure S1.** Fiber network electrospun from the emulsion with the PS/CNF ratio of 65:35 using 1.06 kV cm<sup>-1</sup> field strength and observed using 1 kV voltage in the SEM.

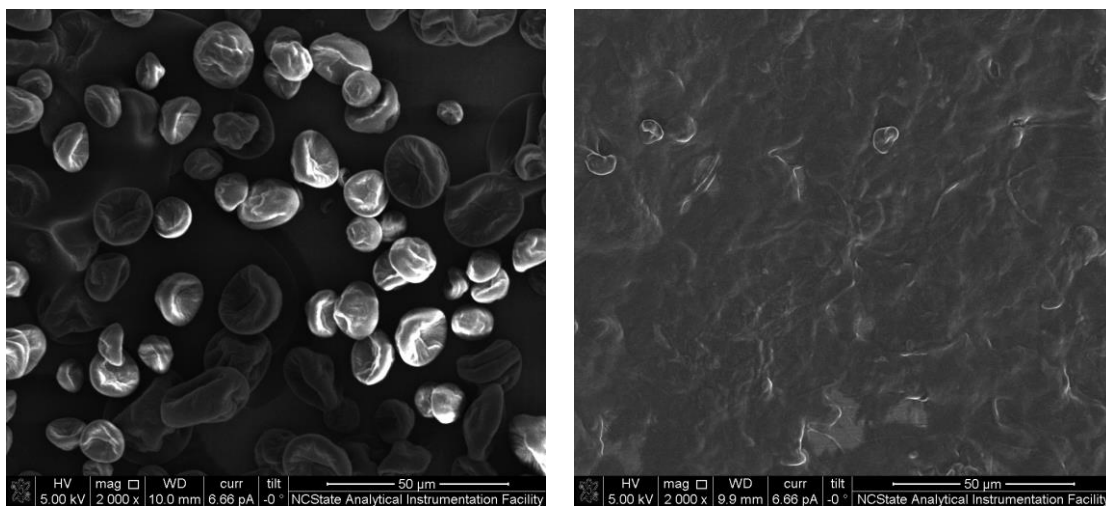

**Figure S2.** Solid materials obtained after electrospinning a system with PS-free systems containing 0.6% CNF, 5 wt. % surfactant, 43.2% water and 46.1% oil phase (toluene) (left). The solid obtained after processing 5.1% PS solution in toluene is also included (right).
